# Supplementary material
Source: publisher site journal article supplement (https://cdn.jamanetwork.com/ama/content_public/journal/jama/0/joi240047supp1_prod_1712157901.17231.pdf)
Supplement: Supplementary file 1 [file joi240047supp1_prod_1712157901.17231.pdf]

## Supplemental Online Content

Feng X, Zahed H, Onwuka J, et al. Cancer Stage Compared With Mortality as End Points in Randomized Clinical Trials of Cancer Screening. *JAMA*. Published online April 7, 2024. doi:10.1001/jama.2024.5814

### eMethods and eResults

This supplemental material has been provided by the authors to give readers additional information about their work.

## **eMethods**

### ***PubMed search strategy:***

#1

(Neoplasms[MeSH Terms]) OR (neoplasm\* [Title/Abstract]) OR (Cancer\* [Title/Abstract]) OR (tumor[Title/Abstract]) OR (tumour[Title/Abstract]) OR (carcinoma\*[Title/Abstract]) OR (malignan\*[Title/Abstract]) OR (oncolog\*[Title/Abstract]) OR (sarcoma\*[Title/Abstract])

#2

(Mass Screening[MeSH Terms]) OR (Early Detection of Cancer[MeSH Terms]) OR (screening[Title/Abstract])

#3

(Randomized Controlled Trial[Publication Type]) OR (Clinical Trial[Publication Type])

#4

(Mortality[MeSH Terms]) OR (Mortality [Title/Abstract]) OR (death[Title/Abstract]) OR (Death[MeSH Terms])

#1 AND #2 AND #3 AND #4

### ***List of information extracted for each study:***

Bibliographic information: Journal, first author, year of publication, name of study, DOI, trial registration number.

Trial design information: Eligible age range, percent female participants, geographical location, years of enrollment, number of participants (total and by arm), type of RCT (individual or cluster randomization), cancer type targeted by the screening intervention, type of screening intervention, type of control/comparison, number of screens, duration of screening in years, average follow-up time (mean or median, or estimated by calculation), staging system used.

Trial results information: Numbers of cancers diagnosed in each arm (stratified at minimum between stage I-II vs III-IV, and additionally by stage I-III vs IV if available), numbers of cancer deaths in each arm, numbers of all-cause deaths in each arm.

**eTable 1. Classification of staging across included studies.**

| <b>Cancer type</b> | <b>Original stage system</b>                                  | <b>Treatment for analysis</b>                                                                        |
|--------------------|---------------------------------------------------------------|------------------------------------------------------------------------------------------------------|
| Breast cancer      | TNM                                                           | Applied directly                                                                                     |
|                    | UICC clinical staging                                         | Applied directly                                                                                     |
|                    | Stage given as I&II or III&IV                                 | Applied directly                                                                                     |
|                    | Tumor size                                                    | Tumor <20 mm: stage 1-2<br>Tumor ≥20 mm: stage 3-4                                                   |
| Colorectal cancer  | TNM                                                           | Applied directly                                                                                     |
|                    | Dukes staging                                                 | A: Stage 1<br>B: Stage 2<br>C: Stage 3<br>D: Stage 4                                                 |
|                    | Localized and advanced                                        | Localized: stage 1-2<br>Advanced: stage 3-4                                                          |
| Lung cancer        | TNM                                                           | Applied directly                                                                                     |
|                    | AJCC Cancer Staging Manual                                    | Applied directly                                                                                     |
|                    | Early/late and resection                                      | Resected early stage: stage 1-2<br>Late stage unresected: stage 3-4                                  |
| Prostate cancer    | TNM                                                           | Applied directly                                                                                     |
|                    | TNM combine with Gleason score and PSA value                  | Low risk: stage 1<br>Intermediate risk: stage 2<br>High risk: stage 3<br>Advanced: stage 4           |
|                    | Gleason score                                                 | Gleason 2-6: stage 1<br>Gleason 7: stage 2<br>Gleason 8-10: stage 3<br>Metastatic: stage 4           |
|                    | Localised or advanced                                         | Localised tumours (T1–2, N0/NX and M0): stage 1-2<br>Advanced tumours (T3–4, N1 or MX/M1): stage 3-4 |
| Other              | TNM                                                           | Applied directly                                                                                     |
|                    | Clinical classification of the China Liver Cancer Study group | Applied directly                                                                                     |
|                    | HCC staging system of China                                   | Applied directly                                                                                     |

For studies that provided summarized clinical stages, we used this directly.

eFigure 1. PRISMA diagram detailing the process of our systematic review.

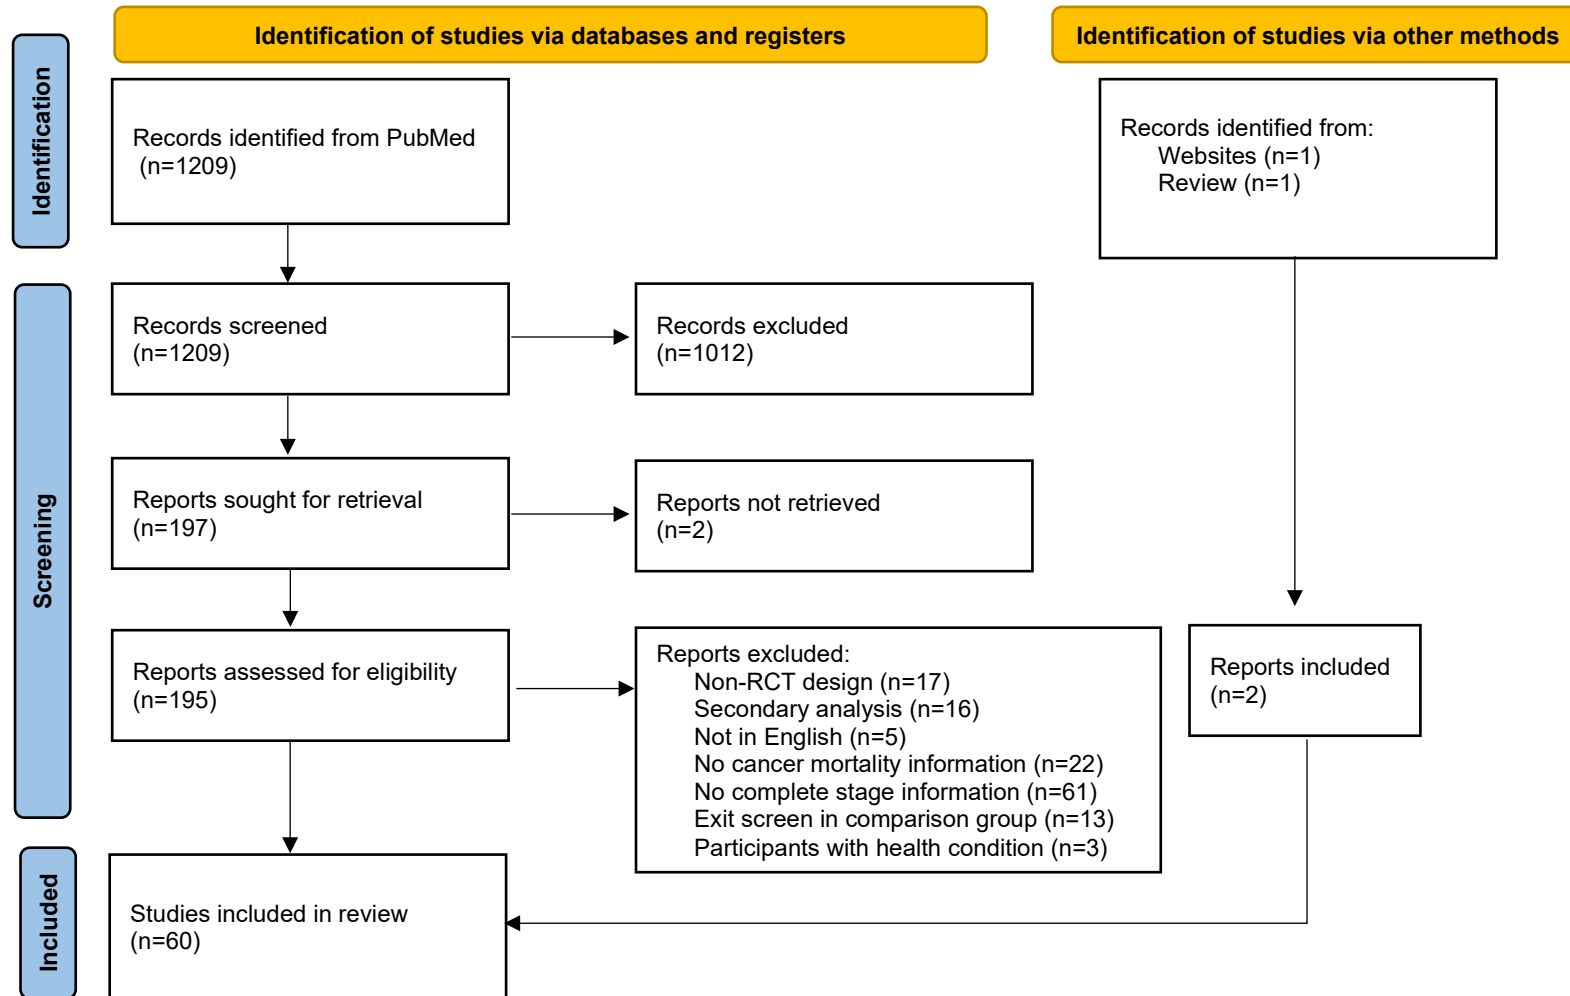

**eTable 2. Publications included after systematic review.**

| Citation (author, journal year)                          | Study name                                                                                      | Location | Cancer type       | Number of participants <sup>a</sup> | Primary report? | Intervention             | Comparison       | Follow-up, years | Reduction in cancer mortality, % | Reduction in stage III-IV cancer, % | Reduction in stage IV cancer, % |
|----------------------------------------------------------|-------------------------------------------------------------------------------------------------|----------|-------------------|-------------------------------------|-----------------|--------------------------|------------------|------------------|----------------------------------|-------------------------------------|---------------------------------|
| Miller et al, J Natl Cancer Inst 2000 <sup>1</sup>       | CNBSS-2: Canadian National Breast Screening Study-2                                             | Canada   | Breast cancer     | 39405                               | yes             | Mammography and CBE      | CBE              | 13.0             | -1.8%                            | 17.8%                               | --                              |
| Miller et al, Ann Intern Med 2002 <sup>2</sup>           | CNBSS: Canadian National Breast Screening Study                                                 | Canada   | Breast cancer     | 50489                               | yes             | Mammography              | Usual care       | 13.5             | 2.8%                             | -4.4%                               | --                              |
| Mittra et al, BMJ 2021 <sup>3</sup>                      | EDBCC: Early Detection of Breast Cancer and Cervical Cancer in Women in India (artificial name) | India    | Breast cancer     | 151538                              | yes             | CBE and cancer awareness | Cancer awareness | 18.0             | 14.2%                            | 17.9%*                              | --                              |
| Roberts et al, Lancet 1990 <sup>4</sup>                  | ERTBCS: Edinburgh Randomised Trial of Breast Cancer Screening (artificial name)                 | UK       | Breast cancer     | 45130                               | yes             | Mammography and CBE      | Usual care       | 7.0              | 15.6%                            | 36.1%*                              | 5.7%                            |
| Alexander et al Br J Cancer, 1994 <sup>5</sup>           | ERTBCS: Edinburgh Randomised Trial of Breast Cancer Screening (artificial name)                 | UK       | Breast cancer     | 44288                               | no              | Mammography and CBE      | Usual care       | 10.0             | 18.6%                            | 44.9%*                              | 41.1%*                          |
| Andersson et al, BMJ 1988 <sup>6</sup>                   | MMSPP: Malmo Mammographic screening Program (artificial name)                                   | Sweden   | Breast cancer     | 42283                               | yes             | Mammography              | Usual care       | 8.8              | 4.1%                             | 18.2%                               | 30.9%                           |
| Ramadas et al, Cancer 2023 <sup>7</sup>                  | TBCS: Trivandrum Breast Cancer Screening Trial                                                  | India    | Breast cancer     | 115290                              | yes             | CBE                      | Usual care       | 14.0             | -2.4%                            | -17.7%                              | -41.9%                          |
| Kronborg et al., Scand J Gastroenterol 1989 <sup>8</sup> | FCCST: Funen Colorectal Cancer Screening Trial (artificial name)                                | Denmark  | Colorectal cancer | 61938                               | yes             | FOBT                     | Usual care       | 3.2              | 27.5%                            | 6.9%                                | -13.0%                          |
| Kronborg et al, Lancet 1996 <sup>9</sup>                 | FCCST: Funen Colorectal Cancer Screening Trial (artificial name)                                | Denmark  | Colorectal cancer | 61933                               | no              | FOBT                     | Usual care       | 10.0             | 17.7%*                           | 16.4%                               | 14.0%                           |
| Faivre et al, Gastroenterology 2004 <sup>10</sup>        | FOBSFCS: Fecal Occult Blood Screening in a French Controlled Study (artificial name)            | France   | Colorectal cancer | 91199                               | yes             | FOBT                     | Usual care       | 11.0             | 16.6%*                           | 14.8%                               | 21.2%*                          |
| Lindholm, et al, Br J Surg 2008 <sup>11</sup>            | GCCST: Göteborg Colorectal Cancer Screening Trial (artificial name)                             | Sweden   | Colorectal cancer | 68308                               | yes             | FOBT                     | Usual care       | 15.5             | 16.0%*                           | 12.0%                               | 5.5%                            |
| Hardcastle et al, Lancet 1996 <sup>12</sup>              | NCCST: Nottingham Colorectal Cancer Screening Trial (artificial name)                           | UK       | Colorectal cancer | 150251                              | yes             | FOBT                     | Usual care       | 7.8              | 14.6%*                           | 8.4%                                | -6.9%                           |
| Scholefield et al,                                       | NCCST: Nottingham Colorectal                                                                    | UK       | Colorectal        | 151975                              | no              | FOBT                     | Usual care       | 19.5             | 3.4%                             | 7.1%                                | 3.6%                            |

| Citation (author, journal year)                               | Study name                                                                  | Location                            | Cancer type       | Number of participants <sup>a</sup> | Primary report? | Intervention                                         | Comparison | Follow-up, years | Reduction in cancer mortality, % | Reduction in stage III-IV cancer, % | Reduction in stage IV cancer, % |
|---------------------------------------------------------------|-----------------------------------------------------------------------------|-------------------------------------|-------------------|-------------------------------------|-----------------|------------------------------------------------------|------------|------------------|----------------------------------|-------------------------------------|---------------------------------|
| Gut 2012 <sup>13</sup>                                        | Cancer Screening Trial (artificial name)                                    |                                     | cancer            |                                     |                 |                                                      |            |                  |                                  |                                     |                                 |
| Mandel et al, N Engl J Med 1993 <sup>14**</sup>               | MCCCS: Minnesota Colon Cancer Control Study (artificial name)               | USA                                 | Colorectal cancer | 30964                               | yes             | 1. Annual FOBT                                       | Usual care | 13.0             | 33.0%*                           | 24.0%*                              | 49.8%*                          |
| Mandel et al, N Engl J Med 1993 <sup>14**</sup>               | MCCCS: Minnesota Colon Cancer Control Study (artificial name)               | USA                                 | Colorectal cancer | 30981                               | yes             | 2. Biennial FOBT                                     | Usual care | 13.0             | 4.5%                             | 5.3%                                | 37.7%*                          |
| Hoff et al, BMJ 2009 <sup>15</sup>                            | NORCCAP: Norwegian Colorectal Cancer Prevention                             | Norway                              | Colorectal cancer | 54745                               | yes             | Flexible sigmoidoscopy with or without a single FOBT | Usual care | 6.0              | 27.0%                            | 10.4%                               | --                              |
| Holme et al, JAMA 2014 <sup>16</sup>                          | NORCCAP: Norwegian Colorectal Cancer Prevention                             | Norway                              | Colorectal cancer | 98792                               | no              | Flexible sigmoidoscopy with or without a single FOBT | Usual care | 11.0             | 18.2%                            | 18.8%*                              | --                              |
| Bretthauer et al, N Engl J Med 2022 <sup>17</sup>             | NordICC: The Northern-European Initiative on Colorectal Cancer              | Poland, Norway, Sweden, Netherlands | Colorectal cancer | 84585                               | yes             | Colonoscopy                                          | Usual care | 10.0             | 8.4%                             | 19.7%                               | 12.3%                           |
| Niv et al, Gut 2002 <sup>18</sup>                             | NSCCST: Northern Israel Colorectal Cancer Screening Trial (artificial name) | Israel                              | Colorectal cancer | 4924                                | yes             | FOBT                                                 | Usual care | 11.0             | 20.3%                            | 22.4%                               | 32.1%                           |
| Schoen et al, N Engl J Med 2012 <sup>19</sup>                 | PLCO: Prostate Lung Colorectal and Ovarian (PLCO) Cancer Screening Trial    | USA                                 | Colorectal cancer | 154910                              | yes             | Flexible sigmoidoscopy                               | Usual care | 12.1             | 26.1%*                           | 29.1%*                              | 33.0%*                          |
| Miller et al, Lancet Gastroenterol Hepatol 2019 <sup>20</sup> | PLCO: Prostate Lung Colorectal and Ovarian (PLCO) Cancer Screening Trial    | USA                                 | Colorectal cancer | 154887                              | no              | Flexible sigmoidoscopy                               | Usual care | 16.8             | 24.0%*                           | 23.4%*                              | 27.5%*                          |
| Segnan et al, J Natl Cancer Inst 2011 <sup>21</sup>           | SCORE: Italian Randomized Controlled Trial                                  | Italy                               | Colorectal cancer | 34292                               | yes             | Flexible sigmoidoscopy                               | Usual care | 11.4             | 21.7%                            | 26.3%*                              | --                              |
| Chen et al, Journal of medical screening 2003 <sup>22</sup>   | QDLCS: Qidong Liver Cancer Screening (artificial name)                      | China                               | Liver cancer      | 5581                                | yes             | AFP assay                                            | Usual care | 5.2              | -0.7%                            | 46.5%*                              | --                              |
| Zhang et al, J Cancer Res Clin Oncol 2004 <sup>23</sup>       | SHCS: Shanghai Hepatocellular Carcinoma Screening (artificial name)         | China                               | Liver cancer      | 18816                               | yes             | AFP and ultrasonography                              | Usual care | 5.0              | 40.3%*                           | 47.2%*                              | --                              |

| Citation (author, journal year)                             | Study name                                                                                           | Location             | Cancer type | Number of participants <sup>a</sup> | Primary report? | Intervention                                    | Comparison                        | Follow-up, years | Reduction in cancer mortality, % | Reduction in stage III-IV cancer, % | Reduction in stage IV cancer, % |
|-------------------------------------------------------------|------------------------------------------------------------------------------------------------------|----------------------|-------------|-------------------------------------|-----------------|-------------------------------------------------|-----------------------------------|------------------|----------------------------------|-------------------------------------|---------------------------------|
| Infante et al, Am J Respir Crit Care Med 2009 <sup>24</sup> | DANTE: Detection and Screening of Early Lung Cancer by Novel Imaging Technology and Molecular Essays | Italy                | Lung cancer | 2472                                | yes             | LDCT                                            | One chest X-ray                   | 2.8              | 6.3%                             | -7.1%                               | 26.4%                           |
| Infante et al, Am J Respir Crit Care Med 2015 <sup>25</sup> | DANTE: Detection and Screening of Early Lung Cancer by Novel Imaging Technology and Molecular Essays | Italy                | Lung cancer | 2450                                | no              | LDCT                                            | One chest X-ray                   | 8.35             | -0.7%                            | 10.3%                               | 26.1%                           |
| Saghir et al, Thorax 2012 <sup>26</sup>                     | DLCST: Danish Lung Cancer Screening Trial                                                            | Denmark              | Lung cancer | 4104                                | yes             | LDCT                                            | Usual care                        | 4.81             | -36.4%                           | -37.5%                              | --                              |
| Wille et al, Am J Respir Crit Care Med 2016 <sup>27</sup>   | DLCST: Danish Lung Cancer Screening Trial                                                            | Denmark              | Lung cancer | 4104                                | no              | LDCT                                            | Usual care                        | 9.8              | -2.6%                            | -12.2%                              | 28.1%                           |
| Sullivan et al, Eur Respir J 2021 <sup>28</sup>             | ECLS: The Early Diagnosis of Lung Cancer Scotland trial                                              | UK                   | Lung cancer | 12209                               | yes             | EarlyCDT, if positive then chest X-ray and LDCT | Usual care                        | 2.0              | 28.8%                            | 26.3%                               | 35.4%                           |
| Paci et al, Thorax 2017 <sup>29</sup>                       | ITALUNG: Italian Lung Cancer Screening Trial                                                         | Italy                | Lung cancer | 3206                                | yes             | LDCT                                            | Usual care                        | 9.3              | 29.2%                            | 24.2%                               | 32.3%                           |
| Becker et al, Int J Cancer 2020 <sup>30</sup>               | LUSI: The German Lung Cancer Screening Intervention Trial                                            | Germany              | Lung cancer | 4052                                | yes             | LDCT                                            | Usual care                        | 8.8              | 27.7%                            | 43.3%*                              | 43.5%                           |
| Pastorino et al, Ann Oncol 2019 <sup>31</sup>               | MILD: Multicentric Italian Lung Detection                                                            | Italy                | Lung cancer | 4099                                | yes             | LDCT                                            | Usual care                        | 10.0             | 27.5%                            | 22.3%                               | 34.3%                           |
| Marcus et al, J Natl Cancer Inst 2000 <sup>32</sup>         | MLP: Lung Cancer Mortality in the Mayo Lung Project                                                  | USA                  | Lung cancer | 9211                                | yes             | Regular chest X-ray and sputum cytology         | One chest X-ray & sputum cytology | 20.5             | -10.6%                           | -2.8%                               | --                              |
| Melamed et al, Chest 1984 <sup>33</sup>                     | MSKS: Memorial Sloan-Kettering Study (artificial name)                                               | USA                  | Lung cancer | 10040                               | yes             | Chest X-ray and cytology                        | Chest X-ray                       | 7.0              | 7.9%                             | -6.2%                               | --                              |
| De Koning et al, N Engl J Med 2020 <sup>34</sup>            | NELSON: The Dutch–Belgian Lung Cancer Screening Trial                                                | Netherlands, Belgium | Lung cancer | 13195                               | yes             | LDCT                                            | Usual care                        | 10.0             | 23.9%*                           | 28.9%*                              | 33.5%*                          |
| Aberle et al, N Engl J Med 2011 <sup>35</sup>               | NLST: National Lung Screening Trial                                                                  | USA                  | Lung cancer | 53454                               | yes             | LDCT                                            | Chest X-ray                       | 6.5              | 19.6%*                           | 21.0%*                              | 32.5%*                          |
| NLST research team, J Thorac Oncol 2019 <sup>36</sup>       | NLST: National Lung Screening Trial                                                                  | USA                  | Lung cancer | 53452                               | no              | LDCT                                            | Chest X-ray                       | 12.3             | 7.2%                             | 16.5%*                              | 21.6%*                          |
| Oken et al, JAMA 2011 <sup>37</sup>                         | PLCO: Prostate Lung Colorectal and Ovarian (PLCO) Cancer                                             | USA                  | Lung cancer | 154901                              | yes             | Chest X-ray                                     | Usual care                        | 13.0             | 1.4%                             | 2.4%                                | 3.0%                            |

| Citation (author, journal year)                       | Study name                                                               | Location | Cancer type              | Number of participants <sup>a</sup> | Primary report? | Intervention                       | Comparison | Follow-up, years | Reduction in cancer mortality, % | Reduction in stage III-IV cancer, % | Reduction in stage IV cancer, % |
|-------------------------------------------------------|--------------------------------------------------------------------------|----------|--------------------------|-------------------------------------|-----------------|------------------------------------|------------|------------------|----------------------------------|-------------------------------------|---------------------------------|
|                                                       | Screening Trial                                                          |          |                          |                                     |                 |                                    |            |                  |                                  |                                     |                                 |
| Field et al, Lancet Reg Health Eur 2021 <sup>38</sup> | UKLS: UK Lung cancer Screening Trial                                     | UK       | Lung cancer              | 4055                                | yes             | LDCT                               | Usual care | 7.3              | 34.8%                            | 56.8%*                              | 74.1%*                          |
| Ji et al, Ann Oncol 2019 <sup>39</sup>                | PRO-NPC-001: Cluster Randomized, Controlled Trial for NPC Screening      | China    | Nasopharyngeal carcinoma | 120932                              | yes             | Anti-EBV antibodies                | Usual care | 6.0              | 31.1%                            | 22.0%                               | 11.6%                           |
| Ramadas et al, Oral Oncol 2003 <sup>40</sup>          | ORSTK: Oral Cancer Screening Trial in Kerala (artificial name)           | India    | Oral cancer              | 130779                              | yes             | Oral visual inspection             | Usual care | 7.0              | 8.8%                             | 10.1%                               | 13.0%                           |
| Sankaranarayanan et al, Lancet 2005 <sup>41</sup>     | ORSTK: Oral Cancer Screening Trial in Kerala (artificial name)           | India    | Oral cancer              | 167915                              | no              | Oral visual inspection             | Usual care | 9.0              | 19.3%                            | 9.7%                                | 12.7%                           |
| Buys et al, JAMA 2011 <sup>42</sup>                   | PLCO: Prostate Lung Colorectal and Ovarian (PLCO) Cancer Screening Trial | USA      | Ovarian cancer           | 68557                               | yes             | CA-125 and transvaginal ultrasound | Usual care | 12.4             | -18.2%                           | -19.2%                              | 20.3%                           |
| Jacobs et al, Lancet 2016 <sup>43**</sup>             | UKCTOCS: UK Collaborative Trial of Ovarian Cancer Screening              | UK       | Ovarian cancer           | 151923                              | yes             | 1. MMS                             | Usual care | 11.1             | 14.7%                            | 16.9%*                              | 38.9%*                          |
| Jacobs et al, Lancet 2016 <sup>43**</sup>             | UKCTOCS: UK Collaborative Trial of Ovarian Cancer Screening              | UK       | Ovarian cancer           | 151922                              | yes             | 2. USS                             | Usual care | 11.1             | 11.2%                            | 9.0%                                | 5.5%                            |
| Menon et al, Lancet 2021 <sup>44**</sup>              | UKCTOCS: UK Collaborative Trial of Ovarian Cancer Screening              | UK       | Ovarian cancer           | 151939                              | no              | 1. MMS                             | Usual care | 16.3             | 4.0%                             | 10.8%                               | 25.0%*                          |
| Menon et al, Lancet 2021 <sup>44**</sup>              | UKCTOCS: UK Collaborative Trial of Ovarian Cancer Screening              | UK       | Ovarian cancer           | 151937                              | no              | 2. USS                             | Usual care | 16.3             | 5.6%                             | 0.2%                                | -1.0%                           |
| Jacobs et al, Lancet 1999 <sup>45</sup>               | UKOCST: UK Ovarian Cancer screening Trial (artificial name)              | UK       | Ovarian cancer           | 21935                               | yes             | CA-125                             | Usual care | 7.0              | 49.9%                            | 38.8%                               | 33.2%                           |
| Martin et al, JAMA 2018 <sup>46</sup>                 | CAP: The Cluster Randomized Trial of PSA Testing for Prostate Cancer     | UK       | Prostate cancer          | 408825                              | yes             | PSA                                | Usual care | 10.0             | 1.7%                             | 7.7%*                               | --                              |
| Schröder et al, N Engl J Med 2009 <sup>47</sup>       | ERSPC: European Randomised Study of Screening for Prostate Cancer        | Europe   | Prostate cancer          | 145179                              | yes             | PSA                                | Usual care | 9.0              | 19.2%*                           | 6.6%                                | 34.5%*                          |
| Schröder et al, N Engl J Med 2012 <sup>48</sup>       | ERSPC: European Randomised Study of Screening for Prostate Cancer        | Europe   | Prostate cancer          | 162243                              | no              | PSA                                | Usual care | 11.0             | 20.7%*                           | 22.3%*                              | 48.0%*                          |



| Citation (author, journal year)                          | Study name                                                                            | Location        | Cancer type     | Number of participants <sup>a</sup> | Primary report? | Intervention | Comparison | Follow-up, years | Reduction in cancer mortality, % | Reduction in stage III-IV cancer, % | Reduction in stage IV cancer, % |
|----------------------------------------------------------|---------------------------------------------------------------------------------------|-----------------|-----------------|-------------------------------------|-----------------|--------------|------------|------------------|----------------------------------|-------------------------------------|---------------------------------|
| Schröder et al, Lancet 2014 <sup>49</sup>                | ERSPC: European Randomised Study of Screening for Prostate Cancer                     | Europe          | Prostate cancer | 162243                              | no              | PSA          | Usual care | 13.0             | 20.2%*                           | 24.5%*                              | 46.9%*                          |
| Hugosson, et al, Eur Urol 2019 <sup>50</sup>             | ERSPC: European Randomised Study of Screening for Prostate Cancer                     | Europe          | Prostate cancer | 162241                              | no              | PSA          | Usual care | 16               | 19.6%*                           | 26.7%*                              | 43.6%*                          |
| Roobol, et al, Eur Urol 2013 <sup>51</sup>               | ERSPC-Rotterdam: European Randomized Study of Screening for Prostate Cancer-Rotterdam | The Netherlands | Prostate cancer | 42376                               | no              | PSA+DRE      | Usual care | 12.8             | 19.8%*                           | -1.9%                               | 57.0%*                          |
| Hugosson et al, Lancet Oncol 2010 <sup>52</sup>          | ERSPC-Sweden: European Randomised Study of Screening for Prostate Cancer-Sweden       | Sweden          | Prostate cancer | 19904                               | no              | PSA          | Usual care | 14.0             | 43.6%*                           | 33.3%*                              | 47.1%*                          |
| Hugosson et al, Scand J Urol 2018 <sup>53</sup>          | ERSPC-Sweden: European Randomised Study of Screening for Prostate Cancer-Sweden       | Sweden          | Prostate cancer | 19899                               | no              | PSA          | Usual care | 18.0             | 35.3%*                           | 29.9%*                              | 43.2%*                          |
| Frånlund et al, J Urol 2022 <sup>54</sup>                | ERSPC-Sweden: European Randomised Study of Screening for Prostate Cancer-Sweden       | Sweden          | Prostate cancer | 19894                               | no              | PSA          | Usual care | 22.0             | 29.1%*                           | 23.1%*                              | 34.5%*                          |
| Kilpeläinen et al, J Natl Cancer Inst 2013 <sup>55</sup> | ERSPC-Finland: European Randomised Study of Screening for Prostate Cancer-Finland     | Finland         | Prostate cancer | 80144                               | no              | PSA          | Usual care | 12.0             | 15.1%                            | 15.8%*                              | --                              |
| Sandblom et al, Eur Urol 2004 <sup>56</sup>              | Norrköping: Norrköping Prostate Cancer Screening                                      | Sweden          | Prostate cancer | 9026                                | yes             | PSA & DRE    | Usual care | 15.0             | -3.9%                            | 12.4%                               | --                              |
| Sandblom et al, BMJ 2011 <sup>57</sup>                   | Norrköping: Norrköping Prostate Cancer Screening                                      | Sweden          | Prostate cancer | 9026                                | no              | PSA & DRE    | Usual care | 20.0             | -16.3%                           | 12.4%                               | --                              |
| Andriole et al, N Engl J Med 2009 <sup>58</sup>          | PLCO: Prostate Lung Colorectal and Ovarian (PLCO) Cancer Screening Trial              | USA             | Prostate cancer | 76693                               | yes             | PSA & DRE    | Usual care | 10.0             | -12.2%                           | 9.6%                                | 7.6%                            |
| Andriole et al, J Natl Cancer Inst 2012 <sup>59</sup>    | PLCO: Prostate Lung Colorectal and Ovarian (PLCO) Cancer Screening Trial              | USA             | Prostate cancer | 76685                               | no              | PSA & DRE    | Usual care | 13.0             | -9.0%                            | 12.5%                               | 13.5%                           |
| Pinsky et al, BJU Int 2019 <sup>60</sup>                 | PLCO: Prostate Lung Colorectal and Ovarian (PLCO) Cancer Screening Trial              | USA             | Prostate cancer | 76683                               | no              | PSA & DRE    | Usual care | 16.9             | 5.4%                             | 13.1%*                              | 15.2%                           |

'Artificial name' indicates that the study name was created by the authors of this review solely for the purpose of tracking.

<sup>a</sup>Total number of participants in the intervention plus comparison groups.

\*P-value<0.05 for difference between study arms based on a proportion test.

\*\*Denotes 3-group trials. Each comparison (e.g. Intervention A vs. control, Intervention B vs. control) is listed in a separate row.

AFP: Alpha-fetoprotein

CBE: Clinical breast examination

CA-125: Cancer antigen 125

DRE: Digital rectal exam

EBV: Epstein-Barr virus

FOBT: Fecal occult blood test

LDCT: Low-dose computed tomography

MMS: Multimodal screening

PSA: Prostate-specific antigen

USS: Transvaginal ultrasound screening

**eFigure 2.** Comparison between the reduction in cancer mortality and reduction in stage III-IV cancer, among 41 cancer screening trials identified by systematic review, using the last reported follow-up timepoint for each trial instead of the earliest timepoint.

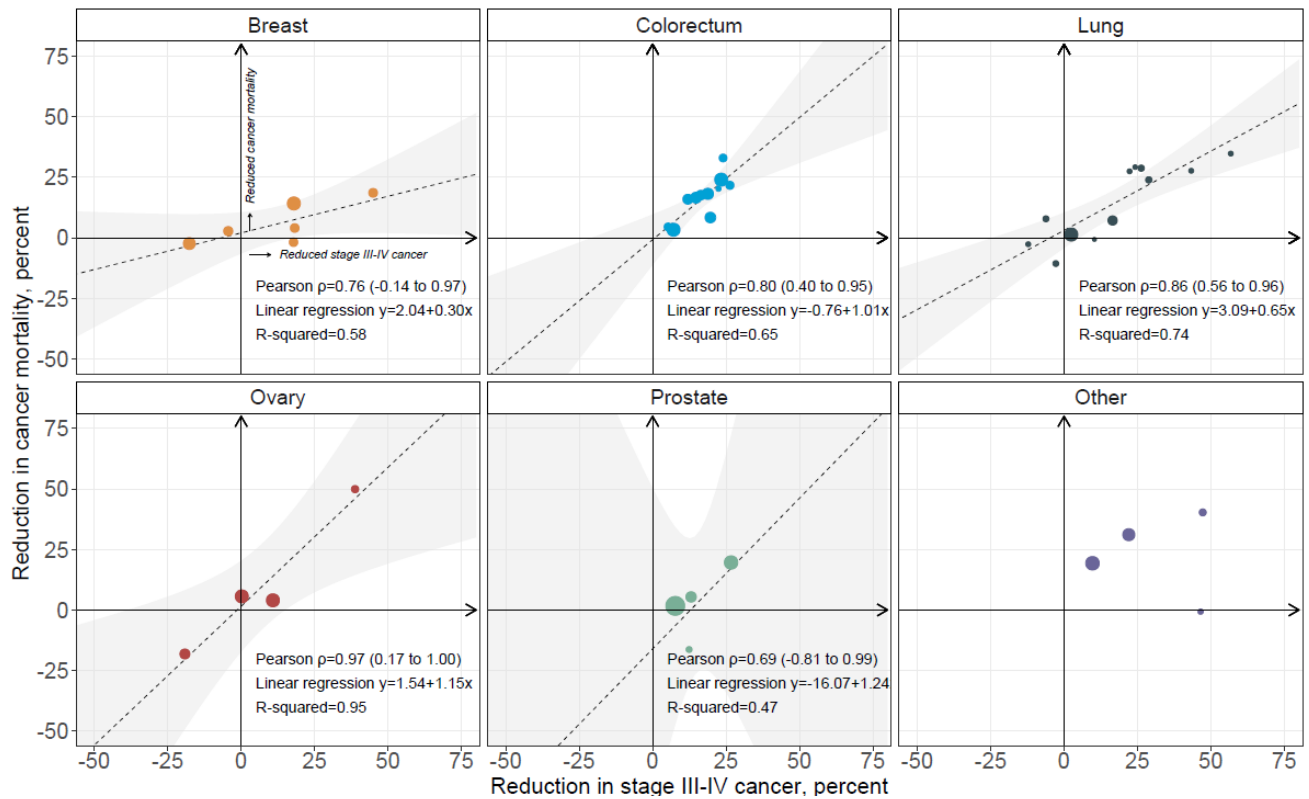

| Cancer type | Studies, N | Correlation | 95% CI        | Weight |
|-------------|------------|-------------|---------------|--------|
| Breast      | 6          | 0.76        | [-0.14; 0.97] | 13.6%  |
| Colorectum  | 11         | 0.80        | [ 0.40; 0.95] | 36.4%  |
| Lung        | 12         | 0.86        | [ 0.56; 0.96] | 40.9%  |
| Ovary       | 4          | 0.97        | [ 0.17; 1.00] | 4.5%   |
| Prostate    | 4          | 0.69        | [-0.81; 0.99] | 4.5%   |
| Total       |            | 0.83        | [ 0.65; 0.92] | 100.0% |

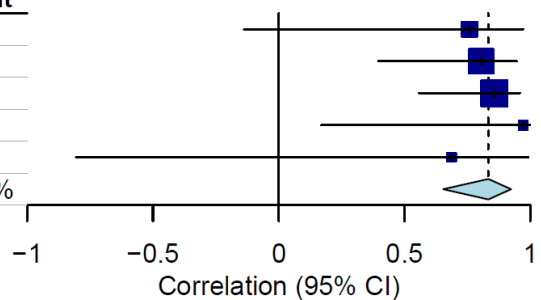

Heterogeneity:  $\chi^2_4 = 1.25$  ( $P = .87$ ),  $I^2 = 0\%$ ,  $\tau^2 = 0$

Positive numbers indicate reductions in mortality or late-stage cancer. Analyses are unweighted. The diameters of the circles are scaled by the number of trial participants.

**eFigure 3.** Comparison between the reduction in cancer mortality and reduction in stage III-IV cancer, among 41 cancer screening trials identified by systematic review, when using (for each trial) the earliest included timepoint for stage III-IV cancer and the latest included timepoint for cancer mortality.

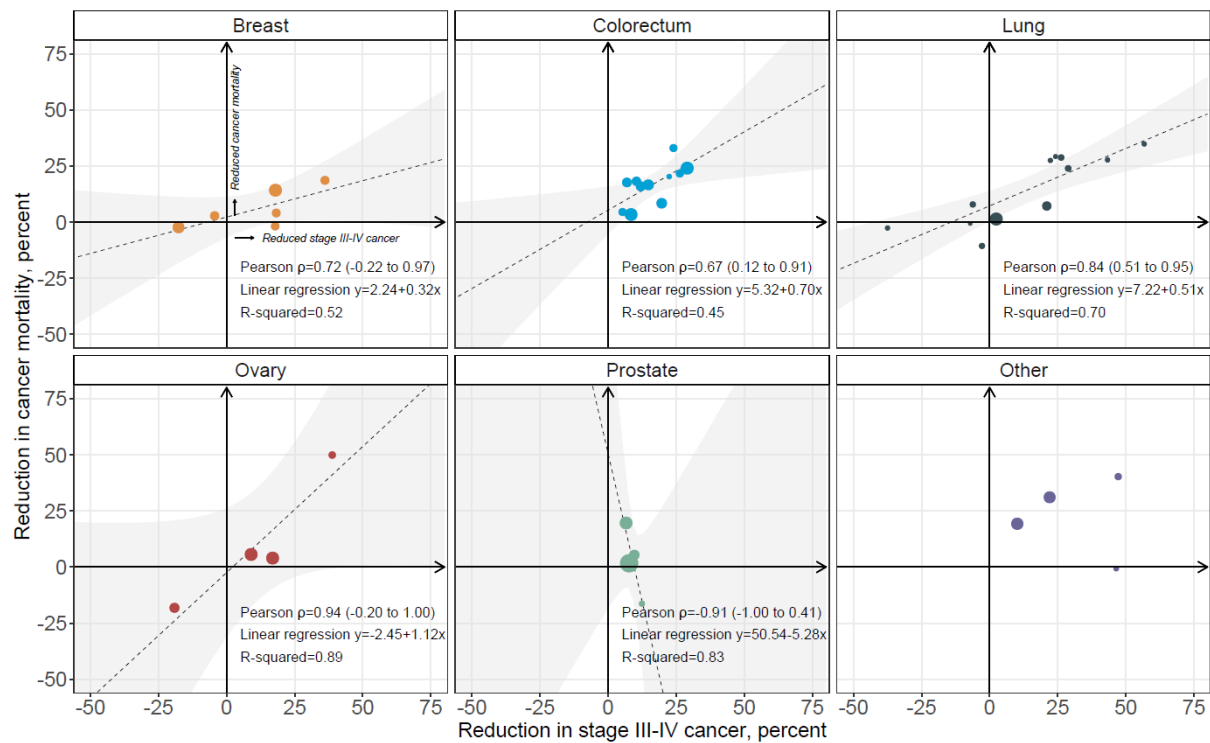

| Cancer type | Studies, N | Correlation | 95% CI        | Weight |
|-------------|------------|-------------|---------------|--------|
| Breast      | 6          | 0.72        | [-0.22; 0.97] | 13.6%  |
| Colorectum  | 11         | 0.67        | [ 0.12; 0.91] | 36.4%  |
| Lung        | 12         | 0.84        | [ 0.51; 0.95] | 40.9%  |
| Ovary       | 4          | 0.94        | [-0.20; 1.00] | 4.5%   |
| Prostate    | 4          | -0.91       | [-1.00; 0.41] | 4.5%   |
| Total       |            | 0.73        | [ 0.47; 0.87] | 100.0% |

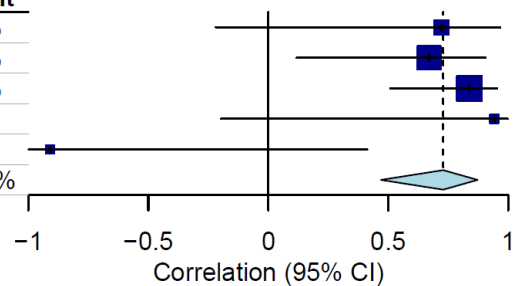

Heterogeneity:  $\chi^2_4 = 7.54$  ( $P = .11$ ),  $I^2 = 47\%$ ,  $\tau^2 < 0.0001$

Positive numbers indicate reductions in mortality or late-stage cancer. Analyses are unweighted. The diameters of the circles are scaled by the number of trial participants.

**eFigure 4.** Comparison between the reduction in cancer mortality and reduction in stage III-IV cancer, among 41 cancer screening trials identified by systematic review, including multiple follow-up timepoints per trial when reported (n=63 total data points).

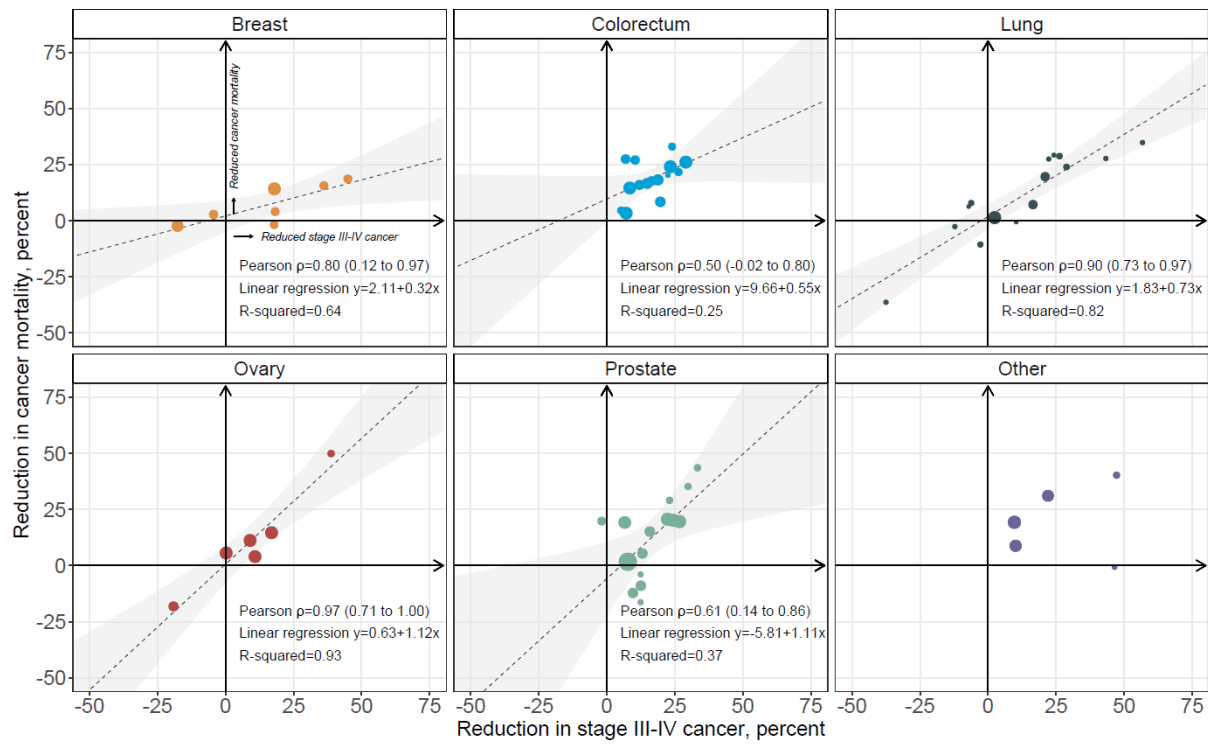

| Cancer type | Studies, N | Correlation | 95% CI         | Weight |
|-------------|------------|-------------|----------------|--------|
| Breast      | 7          | 0.80        | [ 0.12; 0.97]  | 9.3%   |
| Colorectum  | 15         | 0.50        | [ -0.02; 0.80] | 27.9%  |
| Lung        | 15         | 0.90        | [ 0.73; 0.97]  | 27.9%  |
| Ovary       | 6          | 0.97        | [ 0.71; 1.00]  | 7.0%   |
| Prostate    | 15         | 0.61        | [ 0.14; 0.86]  | 27.9%  |
| Total       |            | 0.77        | [ 0.61; 0.86]  | 100.0% |

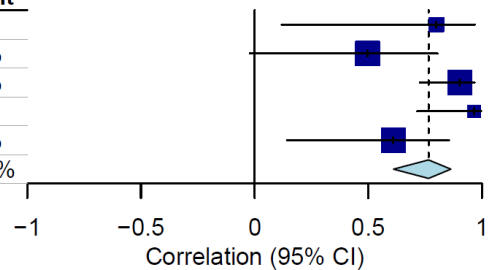

Heterogeneity:  $\chi^2_4 = 9.57$  ( $P = .05$ ),  $I^2 = 58\%$ ,  $\tau^2 = 0.1702$

Positive numbers indicate reductions in mortality or late-stage cancer. Analyses are unweighted. The diameters of the circles are scaled by the number of trial participants.

**eFigure 5.** Comparison between the reduction in cancer mortality and reduction in stage III-IV cancer, among 41 cancer screening trials identified by systematic review, with results of linear regression after removing the y-intercept.

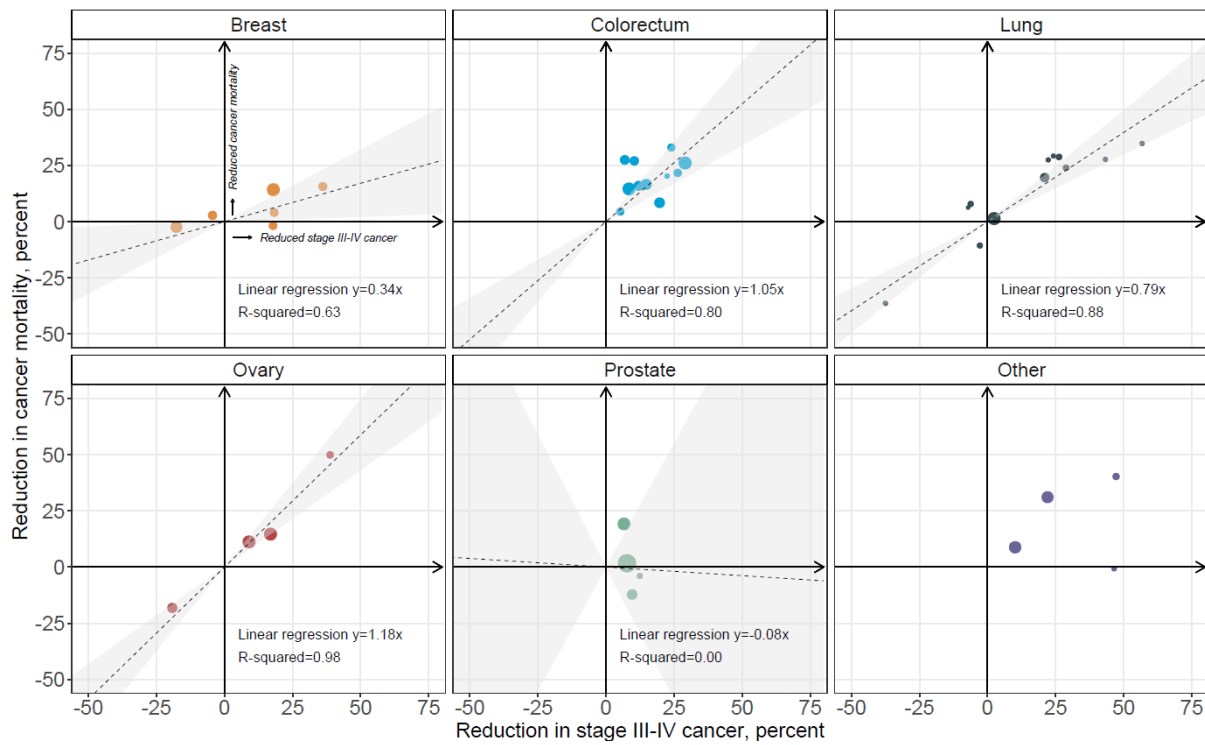

Positive numbers indicate reductions in mortality or late-stage cancer. Analyses are unweighted. The diameters of the circles are scaled by the number of trial participants.

**eFigure 6.** Comparison between the reduction in cancer mortality and reduction in stage III-IV cancer among colorectal cancer screening trials, stratified by screening method (endoscopy vs. fecal occult blood testing [FOBT]).

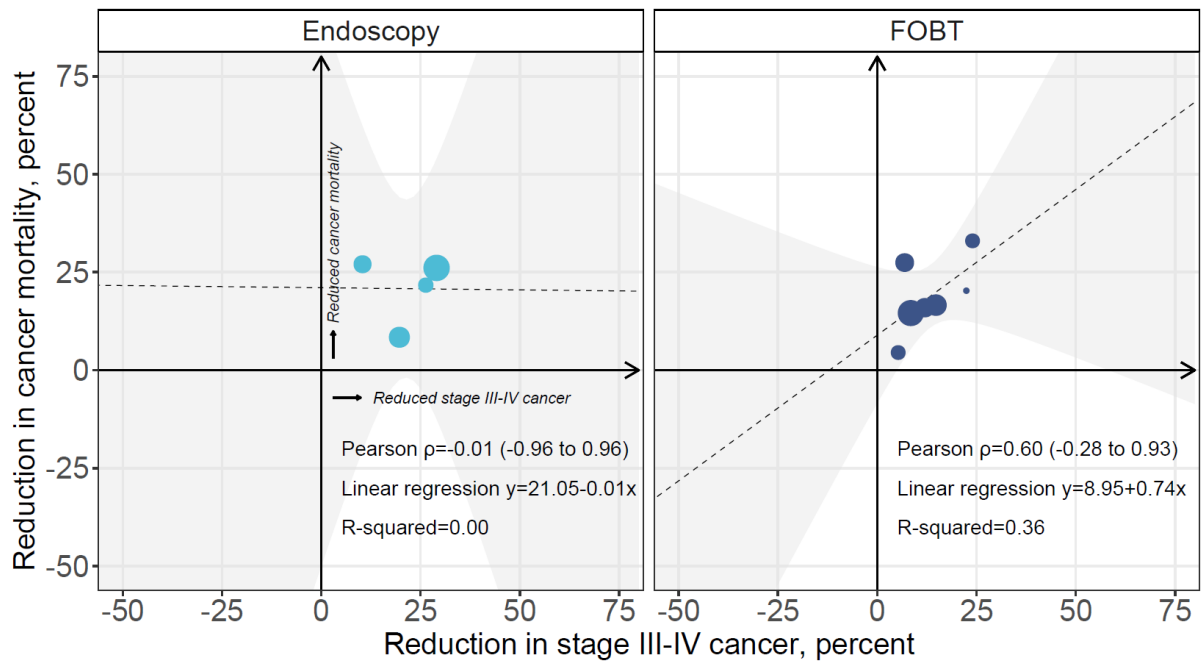

Positive numbers indicate reductions in mortality or late-stage cancer. Analyses are unweighted. The diameters of the circles are scaled by the number of trial participants.

## References:

1. Miller AB, To T, Baines CJ, Wall C. Canadian National Breast Screening Study-2: 13-year results of a randomized trial in women aged 50-59 years. *Journal of the National Cancer Institute*. 2000;92(18):1490-1499. doi:10.1093/jnci/92.18.1490
2. Miller AB, To T, Baines CJ, Wall C. The Canadian National Breast Screening Study-1: breast cancer mortality after 11 to 16 years of follow-up. A randomized screening trial of mammography in women age 40 to 49 years. *Annals of Internal Medicine*. 2002;137(5 Part 1):305-312. doi:10.7326/0003-4819-137-5\_part\_1-200209030-00005
3. Mittra I, Mishra GA, Dikshit RP, et al. Effect of screening by clinical breast examination on breast cancer incidence and mortality after 20 years: prospective, cluster randomised controlled trial in Mumbai. *BMJ (Clinical research ed)*. Feb 24 2021;372:n256. doi:10.1136/bmj.n256
4. Roberts MM, Alexander FE, Anderson TJ, et al. Edinburgh trial of screening for breast cancer: mortality at seven years. *Lancet (London, England)*. Feb 3 1990;335(8684):241-6. doi:10.1016/0140-6736(90)90066-e
5. Alexander FE, Anderson TJ, Brown HK, et al. The Edinburgh randomised trial of breast cancer screening: results after 10 years of follow-up. *British Journal of Cancer*. 1994;70(3):542-548. doi:10.1038/bjc.1994.342
6. Andersson I, Aspegren K, Janzon L, et al. Mammographic screening and mortality from breast cancer: the Malmö mammographic screening trial. *BMJ (Clinical research ed)*. Oct 15 1988;297(6654):943-8. doi:10.1136/bmj.297.6654.943
7. Ramadas K, Basu P, Mathew BS, et al. Effectiveness of triennial screening with clinical breast examination: 14-years follow-up outcomes of randomized clinical trial in Trivandrum, India. *Cancer*. Jan 15 2023;129(2):272-282. doi:10.1002/cncr.34526
8. Kronborg O, Fenger C, Olsen J, Bech K, Søndergaard O. Repeated screening for colorectal cancer with fecal occult blood test. A prospective randomized study at Funen, Denmark. *Scandinavian Journal of Gastroenterology*. Jun 1989;24(5):599-606. doi:10.3109/00365528909093096
9. Kronborg O, Fenger C, Olsen J, Jørgensen OD, Søndergaard O. Randomised study of screening for colorectal cancer with faecal-occult-blood test. *Lancet (London, England)*. Nov 30 1996;348(9040):1467-71. doi:10.1016/s0140-6736(96)03430-7
10. Faivre J, Dancourt V, Lejeune C, et al. Reduction in colorectal cancer mortality by fecal occult blood screening in a French controlled study. *Gastroenterology*. Jun 2004;126(7):1674-80. doi:10.1053/j.gastro.2004.02.018
11. Lindholm E, Brevinge H, Haglund E. Survival benefit in a randomized clinical trial of faecal occult blood screening for colorectal cancer. *The British Journal of Surgery*. Aug 2008;95(8):1029-36. doi:10.1002/bjs.6136
12. Hardcastle JD, Chamberlain JO, Robinson MH, et al. Randomised controlled trial of faecal-occult-blood screening for colorectal cancer. *Lancet (London, England)*. Nov 30 1996;348(9040):1472-7. doi:10.1016/s0140-6736(96)03386-7
13. Scholefield JH, Moss SM, Mangham CM, Whyne DK, Hardcastle JD. Nottingham trial of faecal occult blood testing for colorectal cancer: a 20-year follow-up. *Gut*. Jul 2012;61(7):1036-40. doi:10.1136/gutjnl-2011-300774
14. Mandel JS, Bond JH, Church TR, et al. Reducing mortality from colorectal cancer by screening for fecal occult blood. Minnesota Colon Cancer Control Study. *The New England Journal of Medicine*. 1993;328(19):1365-1371. doi:10.1056/NEJM199305133281901
15. Hoff G, Grotmol T, Skovlund E, Bretthauer M. Risk of colorectal cancer seven years after flexible sigmoidoscopy screening: randomised controlled trial. *BMJ (Clinical research ed)*. May 29 2009;338:b1846. doi:10.1136/bmj.b1846
16. Holme Ø, Løberg M, Kalager M, et al. Effect of flexible sigmoidoscopy screening on colorectal cancer incidence and mortality: a randomized clinical trial. *JAMA*. 2014;312(6):606-615. doi:10.1001/jama.2014.8266
17. Bretthauer M, Løberg M, Wieszczyn P, et al. Effect of Colonoscopy Screening on Risks of Colorectal



- Cancer and Related Death. *The New England Journal of Medicine*. 2022;387(17):1547-1556. doi:10.1056/NEJMoa2208375
18. Niv Y, Lev-El M, Fraser G, Abuksis G, Tamir A. Protective effect of faecal occult blood test screening for colorectal cancer: worse prognosis for screening refusers. *Gut*. 2002;50(1):33-37. doi:10.1136/gut.50.1.33
  19. Schoen RE, Pinsky PF, Weissfeld JL, et al. Colorectal-cancer incidence and mortality with screening flexible sigmoidoscopy. *The New England Journal of Medicine*. Jun 21 2012;366(25):2345-57. doi:10.1056/NEJMoa1114635
  20. Miller EA, Pinsky PF, Schoen RE, Prorok PC, Church TR. Effect of flexible sigmoidoscopy screening on colorectal cancer incidence and mortality: long-term follow-up of the randomised US PLCO cancer screening trial. *The Lancet Gastroenterology & Hepatology*. 2019;4(2):101-110. doi:10.1016/S2468-1253(18)30358-3
  21. Segnan N, Armaroli P, Bonelli L, et al. Once-only sigmoidoscopy in colorectal cancer screening: follow-up findings of the Italian Randomized Controlled Trial--SCORE. *Journal of the National Cancer Institute*. Sep 7 2011;103(17):1310-22. doi:10.1093/jnci/djr284
  22. Chen JG, Parkin DM, Chen QG, et al. Screening for liver cancer: results of a randomised controlled trial in Qidong, China. *Journal of Medical Screening*. 2003;10(4):204-209. doi:10.1258/096914103771773320
  23. Zhang BH, Yang BH, Tang ZY. Randomized controlled trial of screening for hepatocellular carcinoma. *Journal of Cancer Research and Clinical Oncology*. Jul 2004;130(7):417-22. doi:10.1007/s00432-004-0552-0
  24. Infante M, Cavuto S, Lutman FR, et al. A randomized study of lung cancer screening with spiral computed tomography: three-year results from the DANTE trial. *American Journal of Respiratory and Critical Care Medicine*. 2009;180(5):445-453. doi:10.1164/rccm.200901-0076OC
  25. Infante M, Cavuto S, Lutman FR, et al. Long-Term Follow-up Results of the DANTE Trial, a Randomized Study of Lung Cancer Screening with Spiral Computed Tomography. *American Journal of Respiratory and Critical Care Medicine*. 2015;191(10):1166-1175. doi:10.1164/rccm.201408-1475OC
  26. Saghir Z, Dirksen A, Ashraf H, et al. CT screening for lung cancer brings forward early disease. The randomised Danish Lung Cancer Screening Trial: status after five annual screening rounds with low-dose CT. *Thorax*. Apr 2012;67(4):296-301. doi:10.1136/thoraxjnl-2011-200736
  27. Wille MM, Dirksen A, Ashraf H, et al. Results of the Randomized Danish Lung Cancer Screening Trial with Focus on High-Risk Profiling. *American Journal of Respiratory and Critical Care Medicine*. Mar 1 2016;193(5):542-51. doi:10.1164/rccm.201505-1040OC
  28. Sullivan FM, Mair FS, Anderson W, et al. Earlier diagnosis of lung cancer in a randomised trial of an autoantibody blood test followed by imaging. *The European Respiratory Journal*. Jan 2021;57(1)doi:10.1183/13993003.00670-2020
  29. Paci E, Puliti D, Lopes Pegna A, et al. Mortality, survival and incidence rates in the ITALUNG randomised lung cancer screening trial. *Thorax*. Sep 2017;72(9):825-831. doi:10.1136/thoraxjnl-2016-209825
  30. Becker N, Motsch E, Trotter A, et al. Lung cancer mortality reduction by LDCT screening-Results from the randomized German LUSI trial. *International Journal of Cancer*. 2020;146(6):1503-1513. doi:10.1002/ijc.32486
  31. Pastorino U, Silva M, Sestini S, et al. Prolonged lung cancer screening reduced 10-year mortality in the MILD trial: new confirmation of lung cancer screening efficacy. *Annals of Oncology : Official Journal of the European Society for Medical Oncology*. Jul 1 2019;30(7):1162-1169. doi:10.1093/annonc/mdz117
  32. Marcus PM, Bergstralh EJ, Fagerstrom RM, et al. Lung cancer mortality in the Mayo Lung Project: impact of extended follow-up. *Journal of the National Cancer Institute*. 2000;92(16):1308-1316. doi:10.1093/jnci/92.16.1308
  33. Melamed MR, Flehinger BJ, Zaman MB, Heelan RT, Perchick WA, Martini N. Screening for early

- lung cancer. Results of the Memorial Sloan-Kettering study in New York. *Chest*. Jul 1984;86(1):44-53. doi:10.1378/chest.86.1.44
34. de Koning HJ, van der Aalst CM, de Jong PA, et al. Reduced Lung-Cancer Mortality with Volume CT Screening in a Randomized Trial. *The New England Journal of Medicine*. 2020;382(6):503-513. doi:10.1056/NEJMoa1911793
35. Aberle DR, Adams AM, Berg CD, et al. Reduced lung-cancer mortality with low-dose computed tomographic screening. *The New England Journal of Medicine*. 2011;365(5):395-409. doi:10.1056/NEJMoa1102873
36. National Lung Screening Trial Research Team. Lung Cancer Incidence and Mortality with Extended Follow-up in the National Lung Screening Trial. *Journal of Thoracic Oncology : Official Publication of the International Association for the Study of Lung Cancer*. Oct 2019;14(10):1732-1742. doi:10.1016/j.jtho.2019.05.044
37. Oken MM, Hocking WG, Kvale PA, et al. Screening by chest radiograph and lung cancer mortality: the Prostate, Lung, Colorectal, and Ovarian (PLCO) randomized trial. *JAMA*. 2011;306(17):1865-1873. doi:10.1001/jama.2011.1591
38. Field JK, Vulkan D, Davies MPA, et al. Lung cancer mortality reduction by LDCT screening: UKLS randomised trial results and international meta-analysis. *Lancet Reg Health Eur*. Nov 2021;10:100179. doi:10.1016/j.lanepe.2021.100179
39. Ji MF, Sheng W, Cheng WM, et al. Incidence and mortality of nasopharyngeal carcinoma: interim analysis of a cluster randomized controlled screening trial (PRO-NPC-001) in southern China. *Annals of Oncology : Official Journal of the European Society for Medical Oncology*. Oct 1 2019;30(10):1630-1637. doi:10.1093/annonc/mdz231
40. Ramadas K, Sankaranarayanan R, Jacob BJ, et al. Interim results from a cluster randomized controlled oral cancer screening trial in Kerala, India. *Oral Oncology*. Sep 2003;39(6):580-8. doi:10.1016/s1368-8375(03)00041-1
41. Sankaranarayanan R, Ramadas K, Thomas G, et al. Effect of screening on oral cancer mortality in Kerala, India: a cluster-randomised controlled trial. *Lancet (London, England)*. Jun 4-10 2005;365(9475):1927-33. doi:10.1016/s0140-6736(05)66658-5
42. Buys SS, Partridge E, Black A, et al. Effect of screening on ovarian cancer mortality: the Prostate, Lung, Colorectal and Ovarian (PLCO) Cancer Screening Randomized Controlled Trial. *JAMA*. 2011;305(22):2295-2303. doi:10.1001/jama.2011.766
43. Jacobs IJ, Menon U, Ryan A, et al. Ovarian cancer screening and mortality in the UK Collaborative Trial of Ovarian Cancer Screening (UKCTOCS): a randomised controlled trial. *Lancet (London, England)*. 2016;387(10022):945-956. doi:10.1016/S0140-6736(15)01224-6
44. Menon U, Gentry-Maharaj A, Burnell M, et al. Ovarian cancer population screening and mortality after long-term follow-up in the UK Collaborative Trial of Ovarian Cancer Screening (UKCTOCS): a randomised controlled trial. *Lancet (London, England)*. Jun 5 2021;397(10290):2182-2193. doi:10.1016/s0140-6736(21)00731-5
45. Jacobs IJ, Skates SJ, MacDonald N, et al. Screening for ovarian cancer: a pilot randomised controlled trial. *Lancet (London, England)*. Apr 10 1999;353(9160):1207-10. doi:10.1016/s0140-6736(98)10261-1
46. Martin RM, Donovan JL, Turner EL, et al. Effect of a Low-Intensity PSA-Based Screening Intervention on Prostate Cancer Mortality: The CAP Randomized Clinical Trial. *JAMA*. 2018;319(9):883-895. doi:10.1001/jama.2018.0154
47. Schröder FH, Hugosson J, Roobol MJ, et al. Screening and prostate-cancer mortality in a randomized European study. *The New England Journal of Medicine*. Mar 26 2009;360(13):1320-8. doi:10.1056/NEJMoa0810084
48. Schröder FH, Hugosson J, Roobol MJ, et al. Prostate-cancer mortality at 11 years of follow-up. *The New England Journal of Medicine*. Mar 15 2012;366(11):981-90. doi:10.1056/NEJMoa1113135
49. Schröder FH, Hugosson J, Roobol MJ, et al. Screening and prostate cancer mortality: results of the European Randomised Study of Screening for Prostate Cancer (ERSPC) at 13 years of follow-up.

- Lancet (London, England)*. Dec 6 2014;384(9959):2027-35. doi:10.1016/s0140-6736(14)60525-0
50. Hugosson J, Roobol MJ, Månsson M, et al. A 16-yr Follow-up of the European Randomized study of Screening for Prostate Cancer. *European urology*. Jul 2019;76(1):43-51. doi:10.1016/j.eururo.2019.02.009
51. Roobol MJ, Kranse R, Bangma CH, et al. Screening for prostate cancer: results of the Rotterdam section of the European randomized study of screening for prostate cancer. *European urology*. Oct 2013;64(4):530-9. doi:10.1016/j.eururo.2013.05.030
50. Hugosson J, Carlsson S, Aus G, et al. Mortality results from the Göteborg randomised population-based prostate-cancer screening trial. *The Lancet Oncology*. 2010;11(8):725-732. doi:10.1016/S1470-2045(10)70146-7
53. Hugosson J, Godtman RA, Carlsson SV, et al. Eighteen-year follow-up of the Göteborg Randomized Population-based Prostate Cancer Screening Trial: effect of sociodemographic variables on participation, prostate cancer incidence and mortality. *Scandinavian Journal of Urology*. 2018;52(1):27-37. doi:10.1080/21681805.2017.1411392
54. Frånlund M, Månsson M, Godtman RA, et al. Results from 22 years of Followup in the Göteborg Randomized Population-Based Prostate Cancer Screening Trial. *The Journal of Urology*. 2022;208(2):292-300. doi:10.1097/JU.0000000000002696
55. Kilpeläinen TP, Tammela TL, Malila N, et al. Prostate cancer mortality in the Finnish randomized screening trial. *Journal of the National Cancer Institute*. 2013;105(10):719-725. doi:10.1093/jnci/djt038
56. Sandblom G, Varenhorst E, Löfman O, Rosell J, Carlsson P. Clinical consequences of screening for prostate cancer: 15 years follow-up of a randomised controlled trial in Sweden. *European Urology*. Dec 2004;46(6):717-23; discussion 724. doi:10.1016/j.eururo.2004.08.011
57. Sandblom G, Varenhorst E, Rosell J, Löfman O, Carlsson P. Randomised prostate cancer screening trial: 20 year follow-up. *BMJ (Clinical research ed)*. Mar 31 2011;342:d1539. doi:10.1136/bmj.d1539
58. Andriole GL, Crawford ED, Grubb RL, 3rd, et al. Mortality results from a randomized prostate-cancer screening trial. *The New England Journal of Medicine*. 2009;360(13):1310-1319. doi:10.1056/NEJMoa0810696
59. Andriole GL, Crawford ED, Grubb RL, 3rd, et al. Prostate cancer screening in the randomized Prostate, Lung, Colorectal, and Ovarian Cancer Screening Trial: mortality results after 13 years of follow-up. *Journal of the National Cancer Institute*. 2012;104(2):125-132. doi:10.1093/jnci/djr500
60. Pinsky PF, Miller E, Prorok P, Grubb R, Crawford ED, Andriole G. Extended follow-up for prostate cancer incidence and mortality among participants in the Prostate, Lung, Colorectal and Ovarian randomized cancer screening trial. *BJU International*. May 2019;123(5):854-860. doi:10.1111/bju.14580
